# Supplementary material for: ESAT-6 and Ag85A Synthetic Peptides as Candidates for an Immunodiagnostic Test in Children with a Clinical Suspicion of Tuberculosis
Source: Hindawi journal article supplement (doi:10.1155/2021/6673250), 2021-07-06
Supplement: f1 [file 6673250.f1.pdf]

(a)

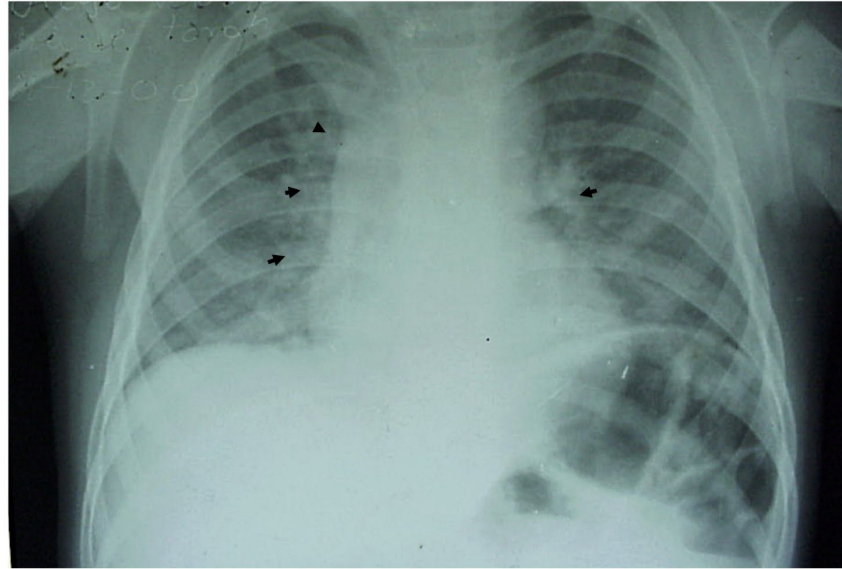

(b)

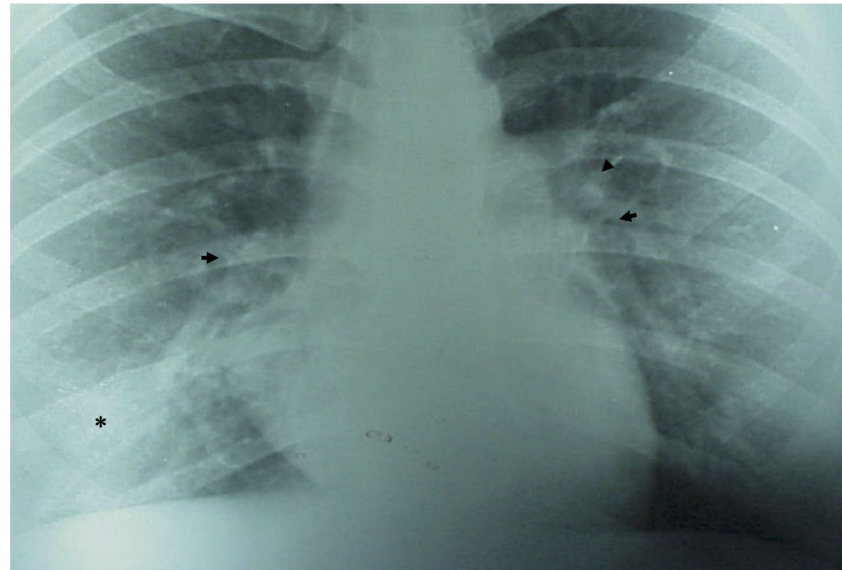

**Figure S1**

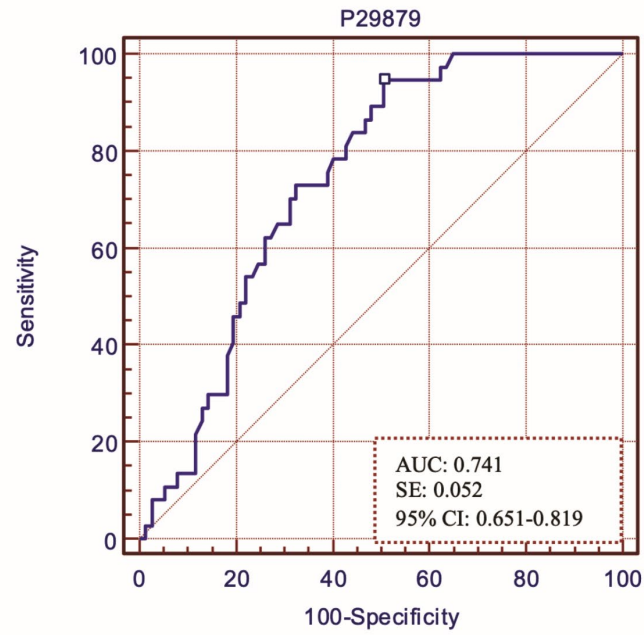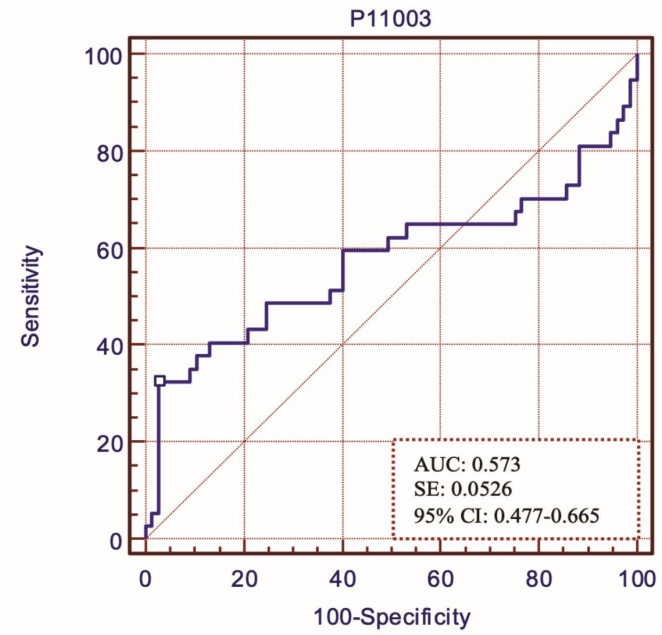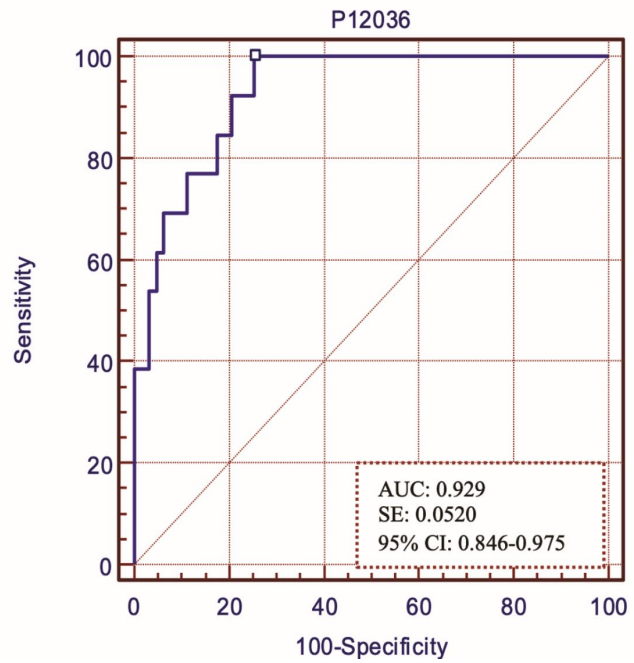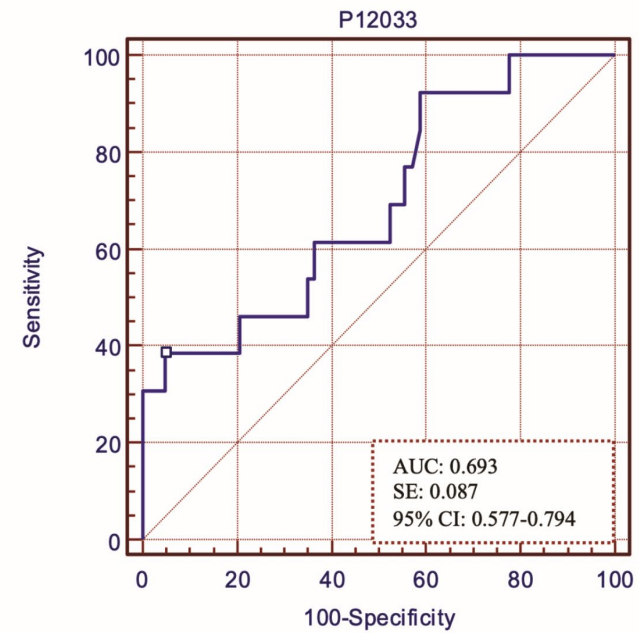

**Figure S2**
